# Supplementary material for: Coronaviruses — drug discovery and therapeutic options
Source: Springer Nature journal article supplement (doi:10.1038/nrd.2015.37), 2016-02-12
Supplement: 41573_2016_BFnrd201537_MOESM12_ESM.pdf [file 41573_2016_BFnrd201537_MOESM12_ESM.pdf]

**Supplementary Figure 1: Global Distribution of SARS and MERS**

**1a: Global distribution of SARS as of 7 August 2003 (Reproduced from REF. 1)**

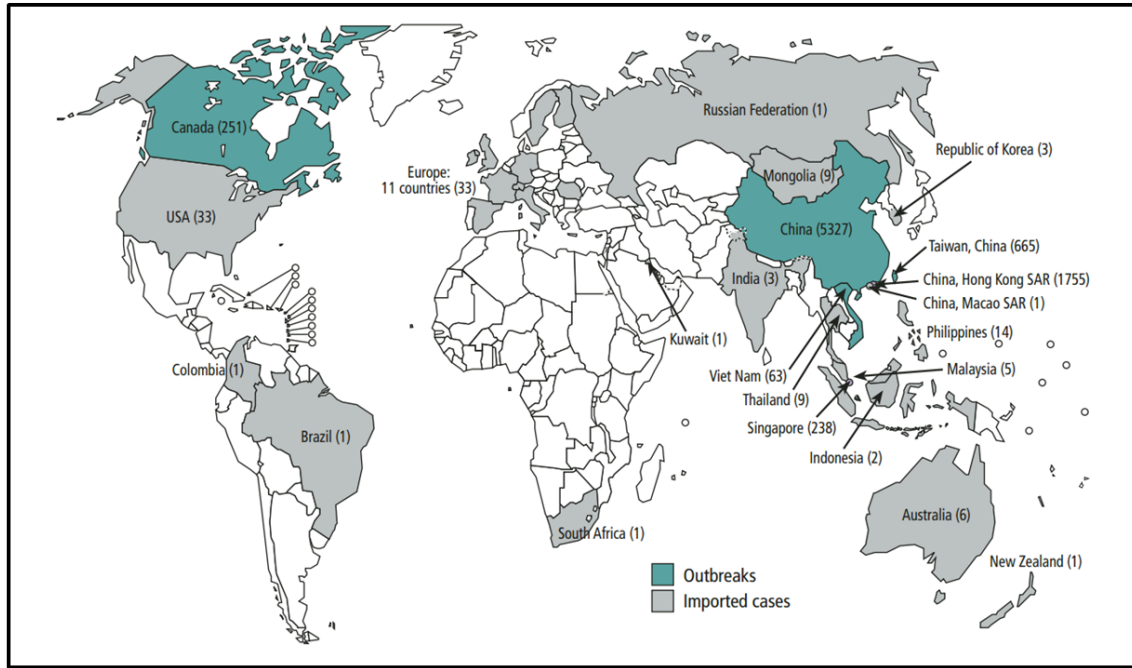

**1b: Epidemic curve of probable SARS cases as of 10 July 2003 (Reproduced from REF. 2)**

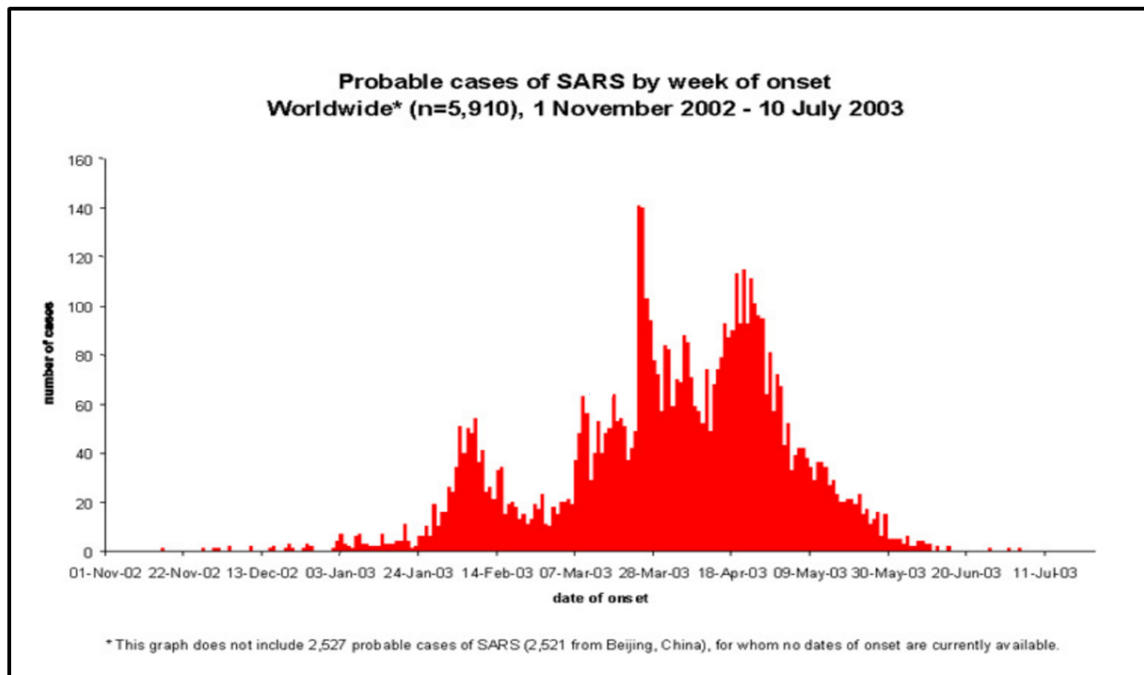

**1c: Global distribution of MERS as of 9 October 2015 (Reproduced from REF. 3)**

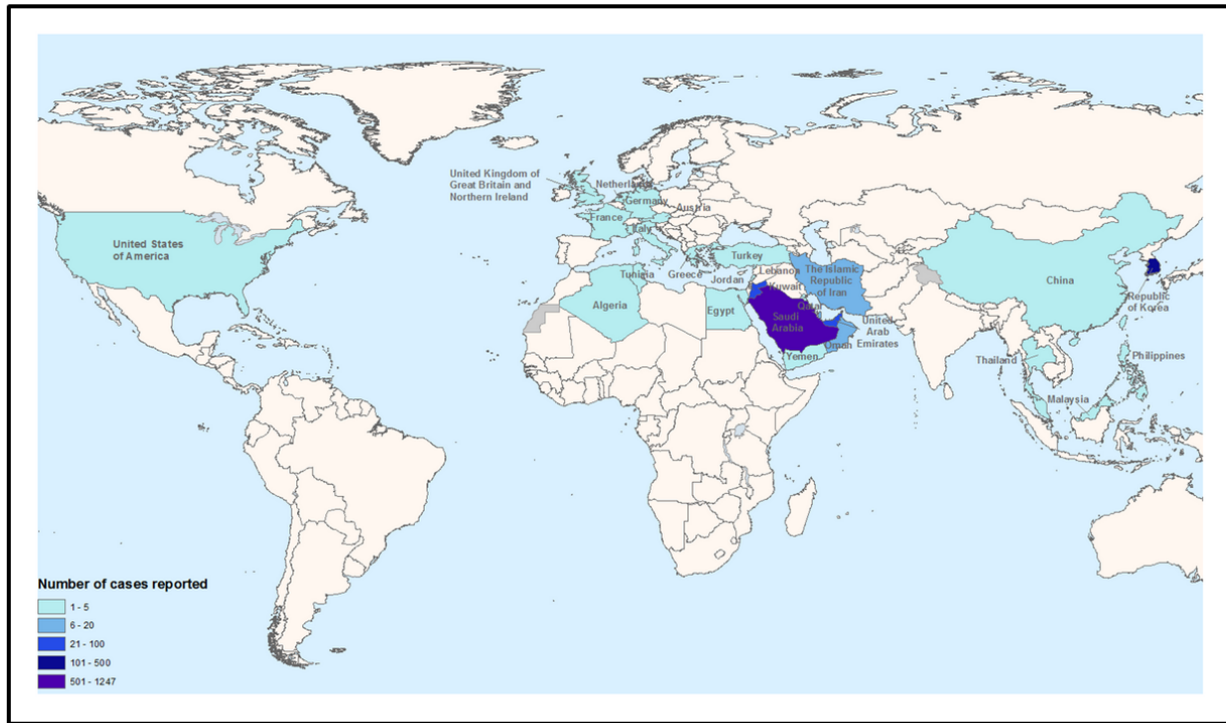

**1d: Epidemic curve of MERS cases as of 9 October 2015 (Reproduced from REF. 3)**

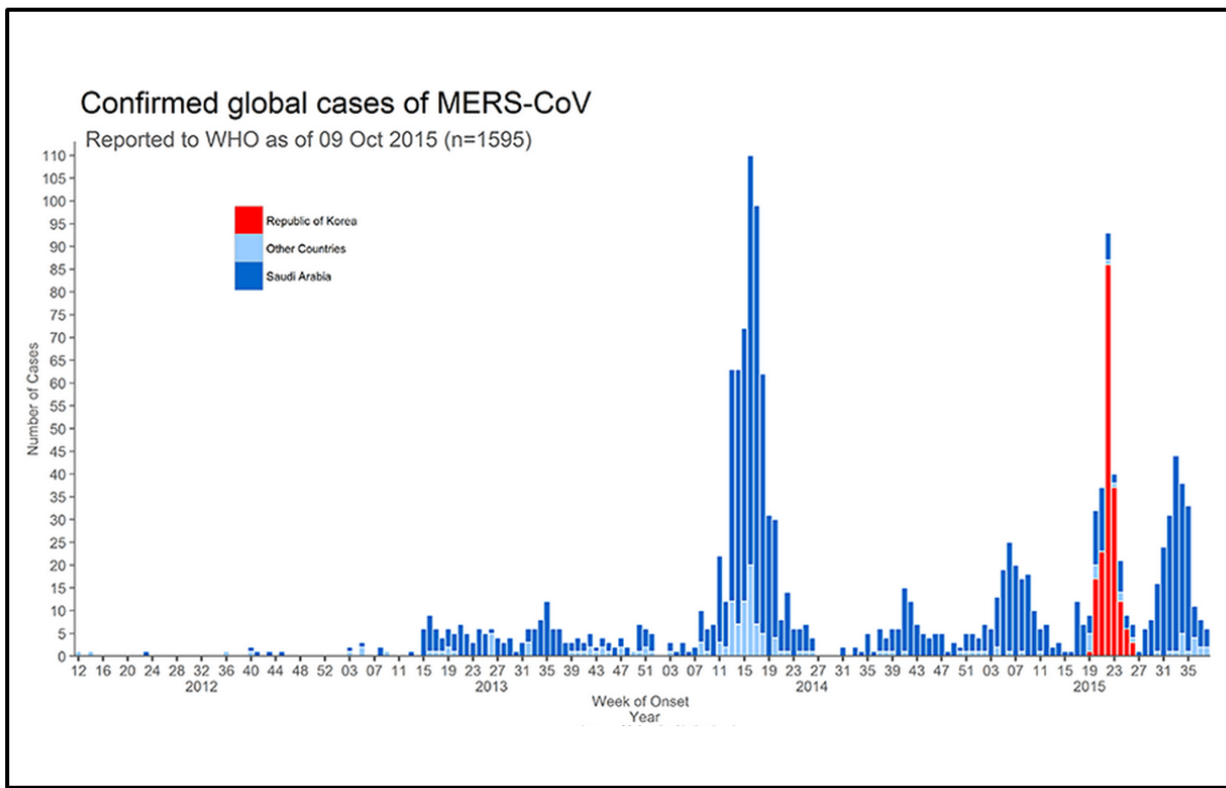

### Supplementary References

1. World Health Organization. The World Health Report 2003. [http://www.who.int/whr/2003/en/whr03\\_en.pdf](http://www.who.int/whr/2003/en/whr03_en.pdf) [accessed on 16 August 2015]
2. World Health Organization. Consensus document on the epidemiology of severe acute respiratory syndrome (SARS). WHO/CDS/CSR/GAR/2003.11 <http://www.who.int/csr/sars/en/WHOconsensus.pdf> [accessed on 16 August 2015]
3. World Health Organization. Middle East respiratory syndrome coronavirus (MERS-CoV). <http://www.who.int/emergencies/mers-cov/en>. [accessed on 10 October 2015]
